# Supplementary material for: Intravenous Injection of PHF-Tau Proteins From Alzheimer Brain Exacerbates Neuroinflammation, Amyloid Beta, and Tau Pathologies in 5XFAD Transgenic Mice
Source: Front Mol Neurosci. 2020 Jul 14;13:106. doi: 10.3389/fnmol.2020.00106 (PMC7381181; doi:10.3389/fnmol.2020.00106)
Supplement: Supplementary file 2 [file Table_1.xlsx]

## Sheet: Feuil1
Suppl. Table 1 : Primary antibodies used in this study.
Name of the antibody	Epitope	Host	Source/ Reference
PHF1	Phosphorylated tau on ser 396/404	Mouse monoclonal	Otvos et al., 1994
MC1	Tau conformational epitope requiring both N-terminal fragment and a C-terminal fragment	Mouse monoclonal	Jicha et al., 1997
AT8	Phosphorylated tau on ser 202/Thr 205	Mouse monoclonal	Thermo Fisher, MN1020
pThr231	Phosphorylated tau on Thr 231	Rabbit polyclonal	Sigma, AB9668
B19	Total tau	Rabbit polyclonal	Brion et al., 1991
BR21	Human tau	Rabbit polyclonal	Ando et al., 2011
mTau5	Murine tau	Mouse monoclonal	Sennvik et al., 2007
Iba1	135-147 amino acids of Iba1	Goat polyclonal	Abcam, Ab5076
GFAP	Pig GFAP	Mouse monoclonal	Sigma, G3893
Ab40	anti-amyloid Ab40	Rabbit polyclonal	Thermo Fisher, 44-136
Ab42	Anti-amyloid Ab42	Rabbit polyclonal	Thermo Fisher, 44-344
6E10	1-16 N-terminal amino acids of amyloid	Mouse monoclonal	Novus Biologicals, NBP2-62566
